# Supplementary material for: Systemic IL-27 administration prevents abscess formation and osteolysis via local neutrophil recruitment and activation
Source: PubMed Central journal article supplement (PMC9418173; doi:10.1038/s41413-022-00228-7), 2022-08-26

## IL-27 chemotaxis assay

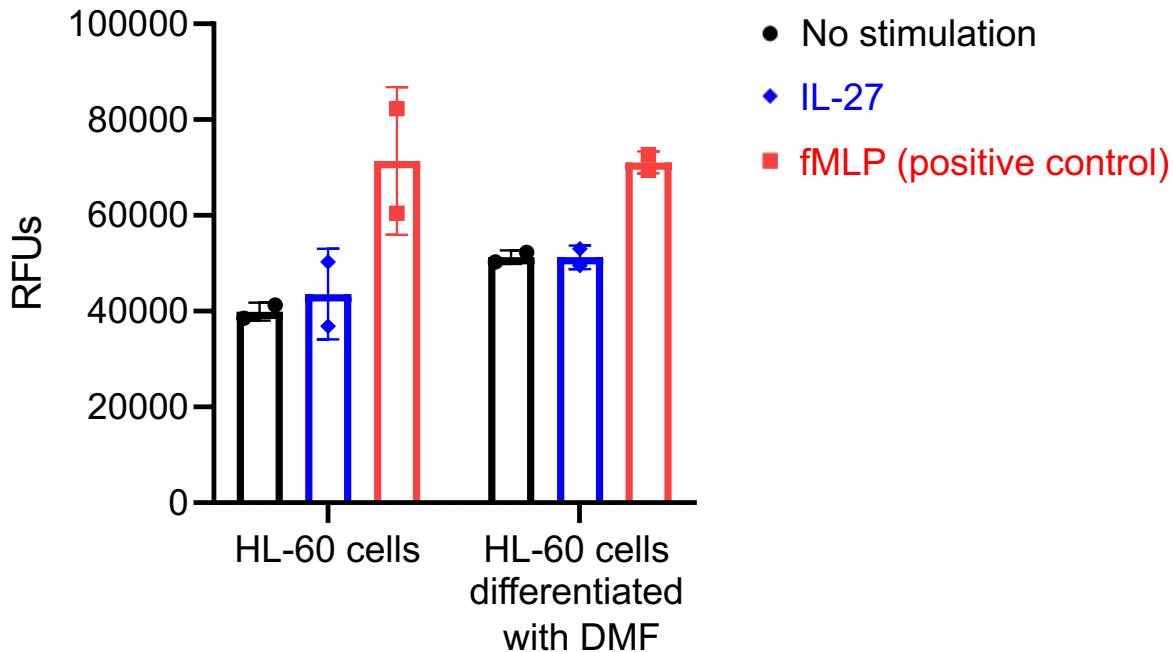

Supplement: 41413_2022_228_MOESM5_ESM.pdf [file 41413_2022_228_MOESM5_ESM.pdf]
